# Supplementary material
Source: publisher figshare collection journal article supplement (https://asha.figshare.com/articles/dataset/_/14714733)
Supplement: Supplementary file 1 [file 1]

## Supplemental Material S2

### INTERVIEW SCHEDULE: IMMEDIATELY AFTER INTERVENTION

**Project Title:** "Growing words: A program evaluation for late talking toddlers"

|                                    |  |
|------------------------------------|--|
| <b>Parent Name:</b>                |  |
| <b>Parent Number:</b>              |  |
| <b>Interview Conducted by:</b>     |  |
| <b>Date and time of interview:</b> |  |

- "The purpose of the interview is to see how you found being a part of this program intervention with your child."
- "Is it OK to record the interview in person using a voice recorder?"
- "So, tell us a bit about why you were interested in this project to start with?"
- "Tell me about your experience being recruited for this study."
- "Do you have any comment or feedback for the research team about how you came to hear about the study or the way the team contacted you when you expressed interest in the research?"
- "Tell me about your experiences completing the vocabulary lists about your child."
- "What about your child's experiences with the assessments? How was that?"
- "Tell me about your experience of attending the program." (length of program, duration of sessions, travel requirements)
- "Do you think this is an appropriate intervention for children like your child who are late to talk?"
- If yes, "Please elaborate on your thoughts about the suitability of this intervention."
- If no, "Could you elaborate on why?"
- "Are there any parts of this intervention that you found particularly enjoyable, or that your child appeared to enjoy?"
- "Are there any parts of this program that you would want to change?"
- "Anything else you would like to add?"
- "Thank you for participating in this interview and supporting this research."
